# Supplementary material for: Intact sensory-motor network structure and function in far from onset premanifest Huntington’s disease
Source: PubMed Central journal article supplement (PMC5339687; doi:10.1038/srep43841), 2017-03-07
Supplement: srep43841-s1.pdf [file srep43841-s1.pdf]

**Intact sensory-motor network structure and function in far from onset premanifest  
Huntington's disease**

**Authors:** Martin Gorges\*<sup>1</sup>, Hans-Peter Müller\*<sup>1</sup>, Isabella Maria Sophie Mayer<sup>1</sup>, Gesa Sophie Grupe<sup>1</sup>, Thomas Kammer<sup>2</sup>, Georg Grön<sup>2</sup>, Jan Kassubek<sup>1</sup>, G. Bernhard Landwehrmeyer<sup>1</sup>, Robert Christian Wolf<sup>3</sup>, Michael Orth<sup>1</sup>

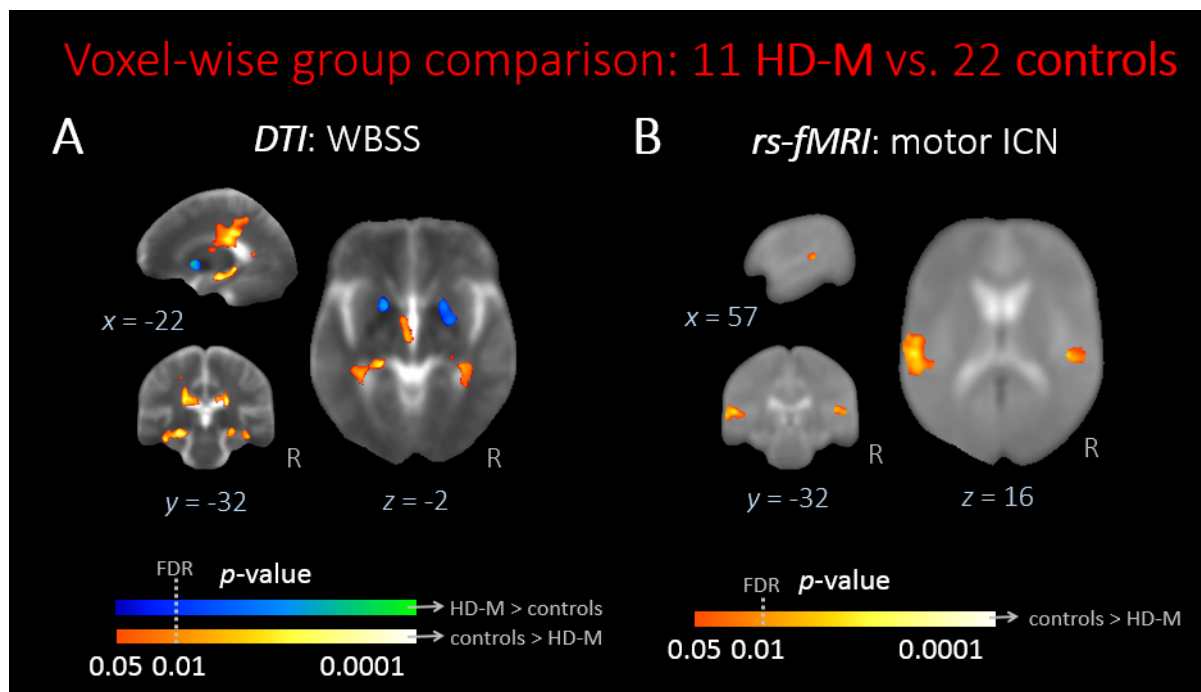

**Supplementary Figure 1:** Replication of functional and structural analyses in a cohort of 11 manifest HD patients (HD-M) compared with controls as reported previously<sup>16</sup>. **(A)** Diffusion tensor imaging (DTI)-based voxel-wise spatial statistics and **(B)** resting-state (rs-) fMRI analysis of the motor intrinsic functional connectivity network (ICN) in manifest HD patients ( $N=11$ ) compared with controls ( $N=22$ ) depict heat maps of the most representative orthogonal slices in MNI coordinates. **(A)** Fractional anisotropy (FA-) maps show decreased (hot colors) and increased (cool colors) FA values in HD patients compared with controls. **(B)** Heat maps showing clusters indicate significantly decreased (hot colors,  $p < 0.05$ , FDR and cluster-wise corrected) motor network functional connectivity in HD patients compared with controls. (A, B).
